# Supplementary material for: Prostate-Specific Antigen as an Ultrasensitive Biomarker for Patients with Early Recurrent Prostate Cancer: How Low Shall We Go? A Systematic Review
Source: MDPI journal article supplement (doi:10.3390/biomedicines12040822), 2024-04-08
Supplement: s1 [file s1]

Supplement **Table S1.** All studies.

| Publication |            |           | Result             |                         |
|-------------|------------|-----------|--------------------|-------------------------|
| Year        | Author     | Reference | Number of patients | Median age at diagnosis |
|             |            |           |                    |                         |
| 2023        | Bogemann   | [20]      | 1509               | 74                      |
|             | Hussain    | [21]      | 1409               | 74                      |
|             | Lee        | [22]      | 397                | 63                      |
|             | Ozyurt     | [23]      | 5                  | NR                      |
|             | Sutil      | [24]      | 427                | 64.5                    |
|             | Tilki      | [25]      | 759                | 64                      |
|             | Ueno       | [26]      | 418                | 67                      |
|             | Wu         | [27]      | NR                 | NR                      |
| 2022        | Cao        | [28]      | NR                 | NR                      |
|             | Orlov      | [29]      | NR                 | NR                      |
|             | Saad       | [30]      | 1401               | 74                      |
|             | Shen       | [31]      | NR                 | NR                      |
|             | Von Eyben  | [37, 38]  | 1216               | 68                      |
| 2021        | Chung      | [34]      | 1493               | 64                      |
|             | Jansen     | [35]      | 315                | 70                      |
|             | Zakaria    | [36]      | 167                | 61                      |
| 2020        | Aki        | [37]      | NR                 | NR                      |
|             | Cid-Barrio | [38]      | NR                 | NR                      |
|             | Dess       | [39]      | 760                | 65                      |
|             | Farschi    | [40]      | NR                 | NR                      |
|             | Ren        | [41]      | 20                 | 61                      |
|             | wang       | [42]      | NR                 | NR                      |
| 2019        | Bottke     | [43]      | 301                | 66                      |
|             | Bryant     | [44]      | 764                | 66                      |
|             | Grivas     | [45]      | 213                | 63                      |
|             | Hahn       | [46]      | NR                 | NR                      |
|             | Jalalvand  | [47]      | NR                 | NR                      |
|             | Pike       | [48]      | 204                | NR                      |
|             | Schroeder  | [49]      | 459                | NR                      |
|             | Sun        | [50]      | NR                 | NR                      |
|             | Tian       | [51]      | NR                 | NR                      |
| 2018        | Burkhardt  | [52]      | 102                | NR                      |
|             | Kang       | [53]      | 269                | NR                      |
|             | Yang       | [54]      | NR                 | NR                      |

|      |                  |      |       |    |
|------|------------------|------|-------|----|
|      | Zhou             | [55] | NR    | NR |
| 2017 | Abugharib        | [56] | 657   | NR |
|      | Heydari-Bafrooei | [57] | NR    | NR |
|      | Liu              | [58] | NR    | NR |
|      | Royce            | [59] | 73    | 73 |
|      | Skove            | [60] | 1939  | NR |
|      | Vesely           | [61] | 295   |    |
|      | Von Eyben        | [62] | 1     | 57 |
| 2016 | Boehm            | [63] | 5617  | 65 |
|      | Fossati          | [64] | 716   | NR |
|      | Laajala          | [65] | 555   | 64 |
|      | Naik             | [66] | 532   | 64 |
|      | Sokoll           | [67] | 754   | 61 |
|      | Stish            | [68] | 1106  | 67 |
| 2015 | Kang             | [69] | 247   | NR |
|      | Kavosi           | [70] | NR    | NR |
|      | Liang            | [71] | NR    | NR |
|      | Seikkula         | [72] | 604   | 64 |
|      | Tang             | [73] | NR    | NR |
|      | Tilki            | [74] | 14532 | 64 |
| 2014 | Briganti         | [75] | 472   | 62 |
|      | Chen             | [76] | NR    | NR |
|      | Furubayashi      | [77] | 200   | 66 |
|      | Jackson          | [78] | 448   | 65 |
|      | Keto             | [79] | 294   | 65 |
|      | Mir              | [80] | 2348  | 60 |
|      | Vesely           | [81] | 116   | NR |
| 2013 | Vesely           | [82] | 319   | NR |
| 2012 | D'Amico          | [83] | 734   | 63 |
|      | Ho               | [84] | 1038  | 69 |
|      | Lepor            | [85] | 31    | 61 |
|      | McDenmed         | [86] | NR    | NR |
|      | Siegmann         | [87] | 301   | 66 |
|      | Yoshida          | [88] | 102   | NR |
| 2011 | Malik            | [89] | 1197  | 58 |
|      | Wilson           | [90] | 33    | 64 |
| 2010 | Chang            | [91] | 115   | MR |
|      | Eisenberg        | [92] | 525   | NR |
|      | Hong             | [93] | 206   | 65 |
|      | Moreira          | [94] | 2735  | NR |
| 2009 | Lee              | [95] | NR    | NR |

|              |             |       |       |    |
|--------------|-------------|-------|-------|----|
|              | Mani        | [96]  | NR    | NR |
|              | Thaxton     | [97]  | NR    | NR |
|              | Viney       | [98]  | 300   | NR |
|              | Wiegel      | [99]  | 162   | 66 |
|              | Zelevsky    | [100] | 844   | 66 |
| 2007         | Kinoshita   | [101] | 257   | 65 |
|              | Shimizu     | [102] | 182   | NR |
|              | Stephenson  | [103] | 1540  | NR |
| 2006         | Ray         | [104] | 4839  | NR |
|              | Sakai       | [105] | 177   | 69 |
|              | Stephenson  | [106] | 3125  | NR |
|              | Taylor      | [107] | 225   | 69 |
| 2005         | Nakamura    | [108] | 46    | NR |
|              | Shen        | [109] | 905   | 60 |
| 2003         | Shinghal    | [110] | 15    | 60 |
| 2000         | Doherty     | [111] | 200   | 61 |
|              | Vassilikos  | [112] | 197   | NR |
| 1999         | Allard      | [113] | 155   | NR |
|              | Haese       | [114] | 482   | NR |
|              | Pound       | [115] | 1997  | NR |
| 1998         | Arai        | [116] | 34    | NR |
|              | Garg        | [117] | 78    | NR |
|              | Morris      | [118] | 159   | NR |
| 1997         | Ellis       | [119] | 170   | NR |
|              | Pruhti      | [120] | 31    | NR |
|              | Yu          | [122] | 148   | NR |
|              | Witherspoon | [121] | 127   | NR |
| 1996         | Ferguson    | [123] | NR    | NR |
|              | Van Irsel   | [124] | 137   | NR |
| 1995         | Khosravi    | [125] | NR    | NR |
|              | Mione       | [126] | NR    | NR |
|              | Schambeck   | [127] | 111   | NR |
|              | Yu          | [128] | 15    | NR |
| 1994         | Klee        | [129] | NR    | NR |
| 1993         | Arai        | [130] | NR    | NR |
|              | iiedtke     | [131] | NR    | NR |
|              | Stamey      | [132] | 187   | NR |
|              | yu          | [133] | NR    | NR |
| 1992         | Vessella    | [134] | NR    | NR |
| Total number |             |       | 65489 |    |

|  |  |  |  |  |
|--|--|--|--|--|
|  |  |  |  |  |
|--|--|--|--|--|

Abbreviation: NR = not reported
